# Supplementary material for: Quality Evaluation of Bioactive Ingredients in Lianhua Qingwen Capsule Based on Quantitative Analysis of Multicomponent by the Single Marker Method and the Chemical Recognition Patterns Method
Source: Hindawi journal article supplement (doi:10.1155/2023/2694284), 2023-08-17
Supplement: f1 [file 2694284.f1.zip]

Archive with 3 entries (3 files):
- FIGURE S1. Chromatograms of LHQW at different wavelengths..ai
- FIGURE S2. HPLC chromatograms of ten bioactive ingredients in LHQW..ai
- supplementary figures.docx
