# Supplementary material for: Quality Evaluation of Bioactive Ingredients in Lianhua Qingwen Capsule Based on Quantitative Analysis of Multicomponent by the Single Marker Method and the Chemical Recognition Patterns Method
Source: Hindawi journal article supplement (doi:10.1155/2023/2694284), 2023-08-17

**TABLE S1** Detailed information of 20 batches of LHQW samples

| Sample | Batch | Average weight of capsule content(*n*=20) | Sample weight (g) |
| --- | --- | --- | --- |
| 1 | B2102150 | 0.3633 | 1.0039 |
| 2 | B2102154 | 0.3526 | 1.0032 |
| 3 | B2102009 | 0.3498 | 1.0030 |
| 4 | B2102186 | 0.3548 | 1.0001 |
| 5 | B2101158 | 0.3562 | 1.0025 |
| 6 | B2102166 | 0.3579 | 1.0124 |
| 7 | B2102148 | 0.3667 | 1.0008 |
| 8 | B2102078 | 0.3561 | 1.0008 |
| 9 | B2101161 | 0.3732 | 1.0010 |
| 10 | B2102162 | 0.3539 | 1.0007 |
| 11 | B2101315 | 0.3605 | 1.0008 |
| 12 | B2102175 | 0.3551 | 1.0009 |
| 13 | B2101162 | 0.3622 | 1.0009 |
| 14 | B2101153 | 0.3556 | 1.0002 |
| 15 | B2011041 | 0.3542 | 1.0003 |
| 16 | B2009007 | 0.3607 | 1.0004 |
| 17 | B2012044 | 0.3565 | 1.0006 |
| 18 | B2010217 | 0.3552 | 1.0005 |
| 19 | B2101064 | 0.3579 | 1.0003 |
| 20 | B2012099 | 0.3543 | 1.0006 |


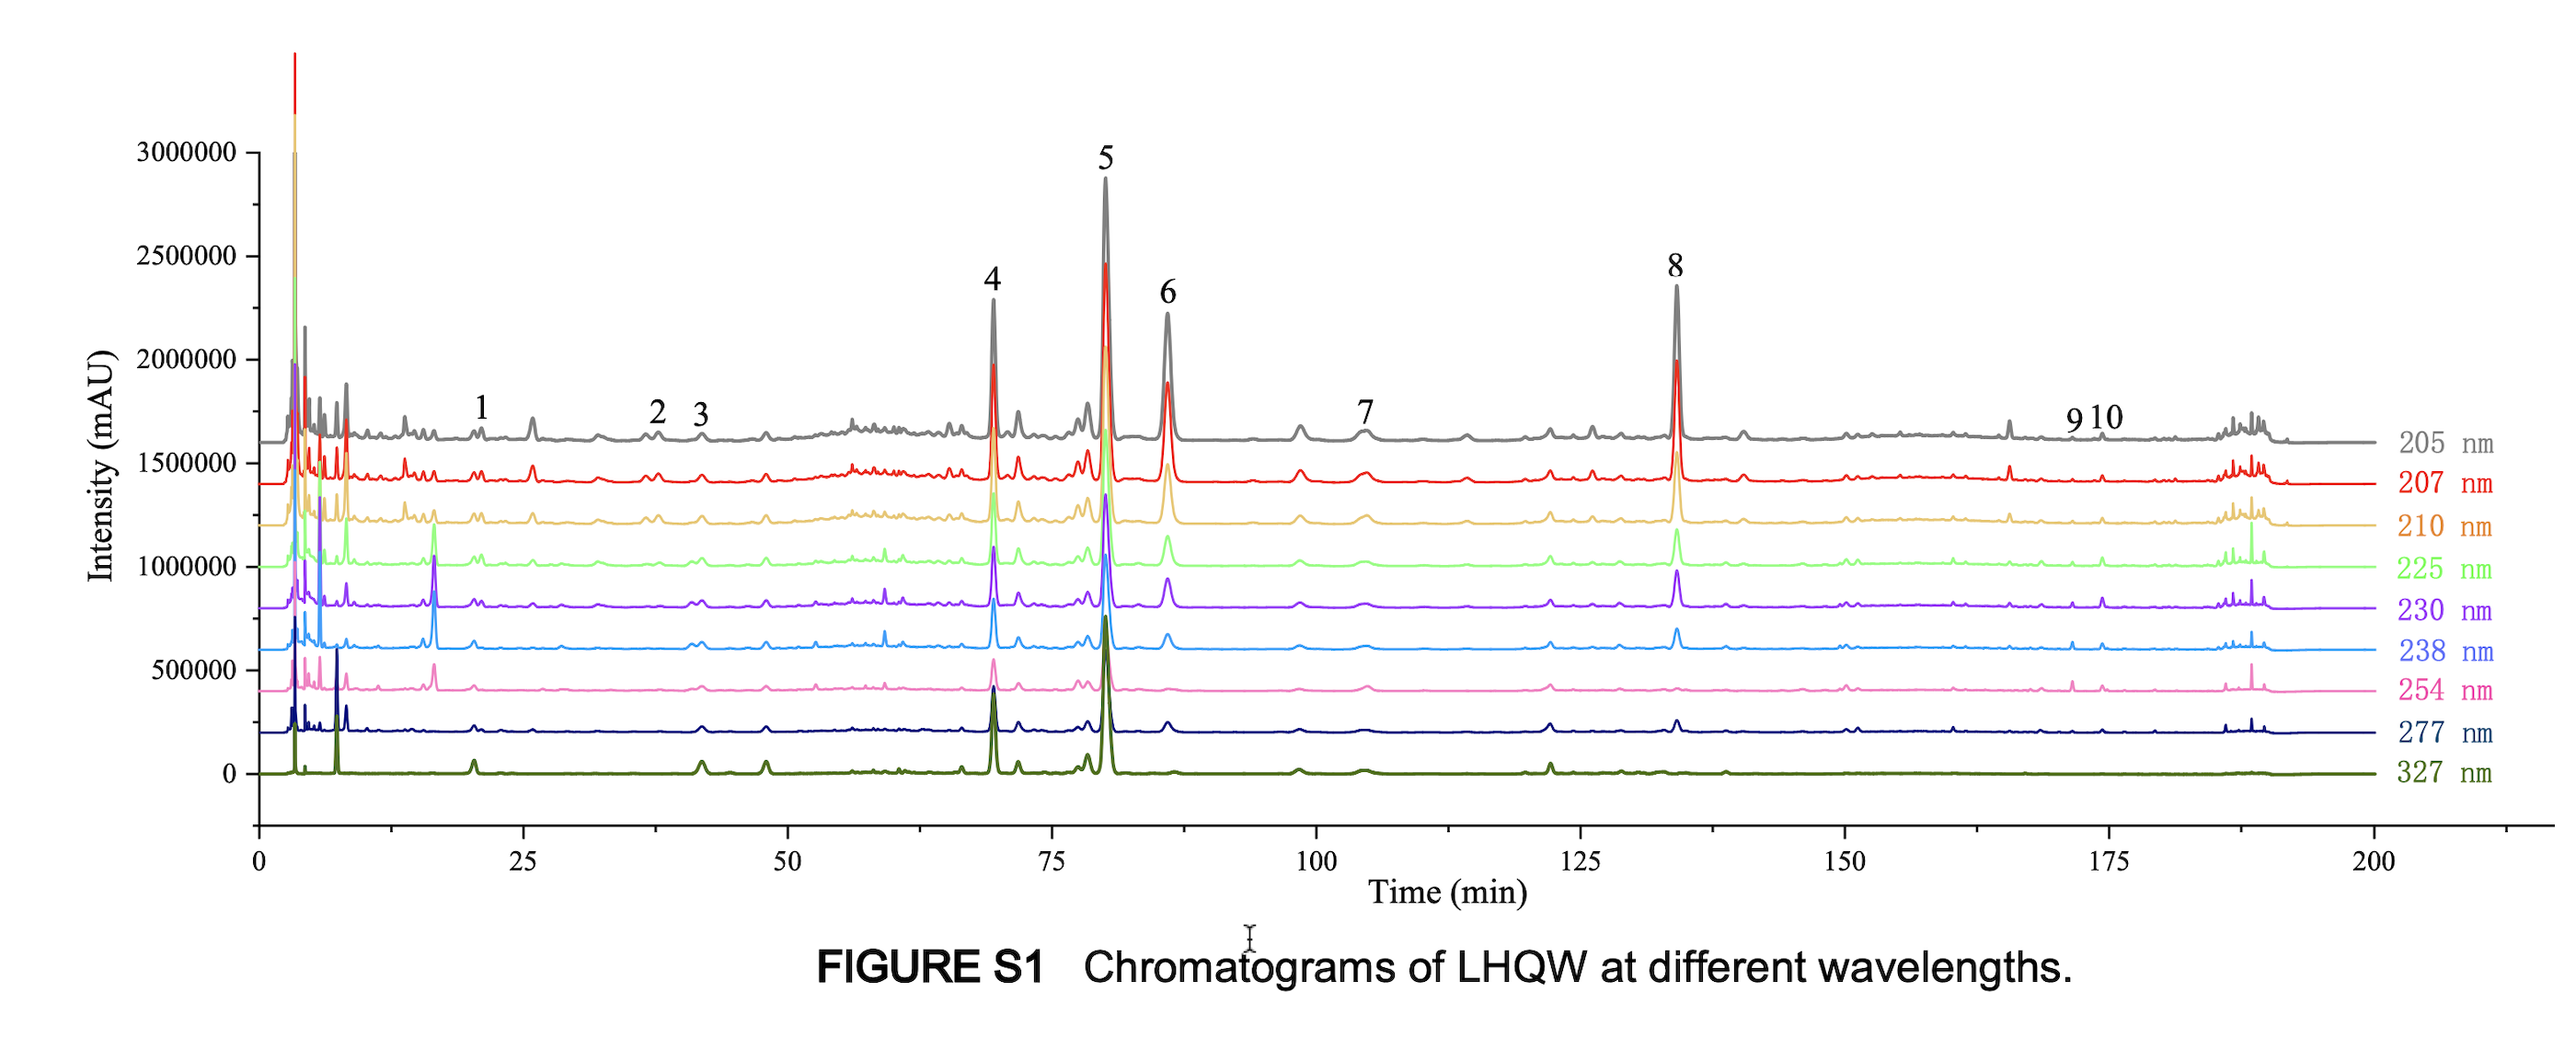


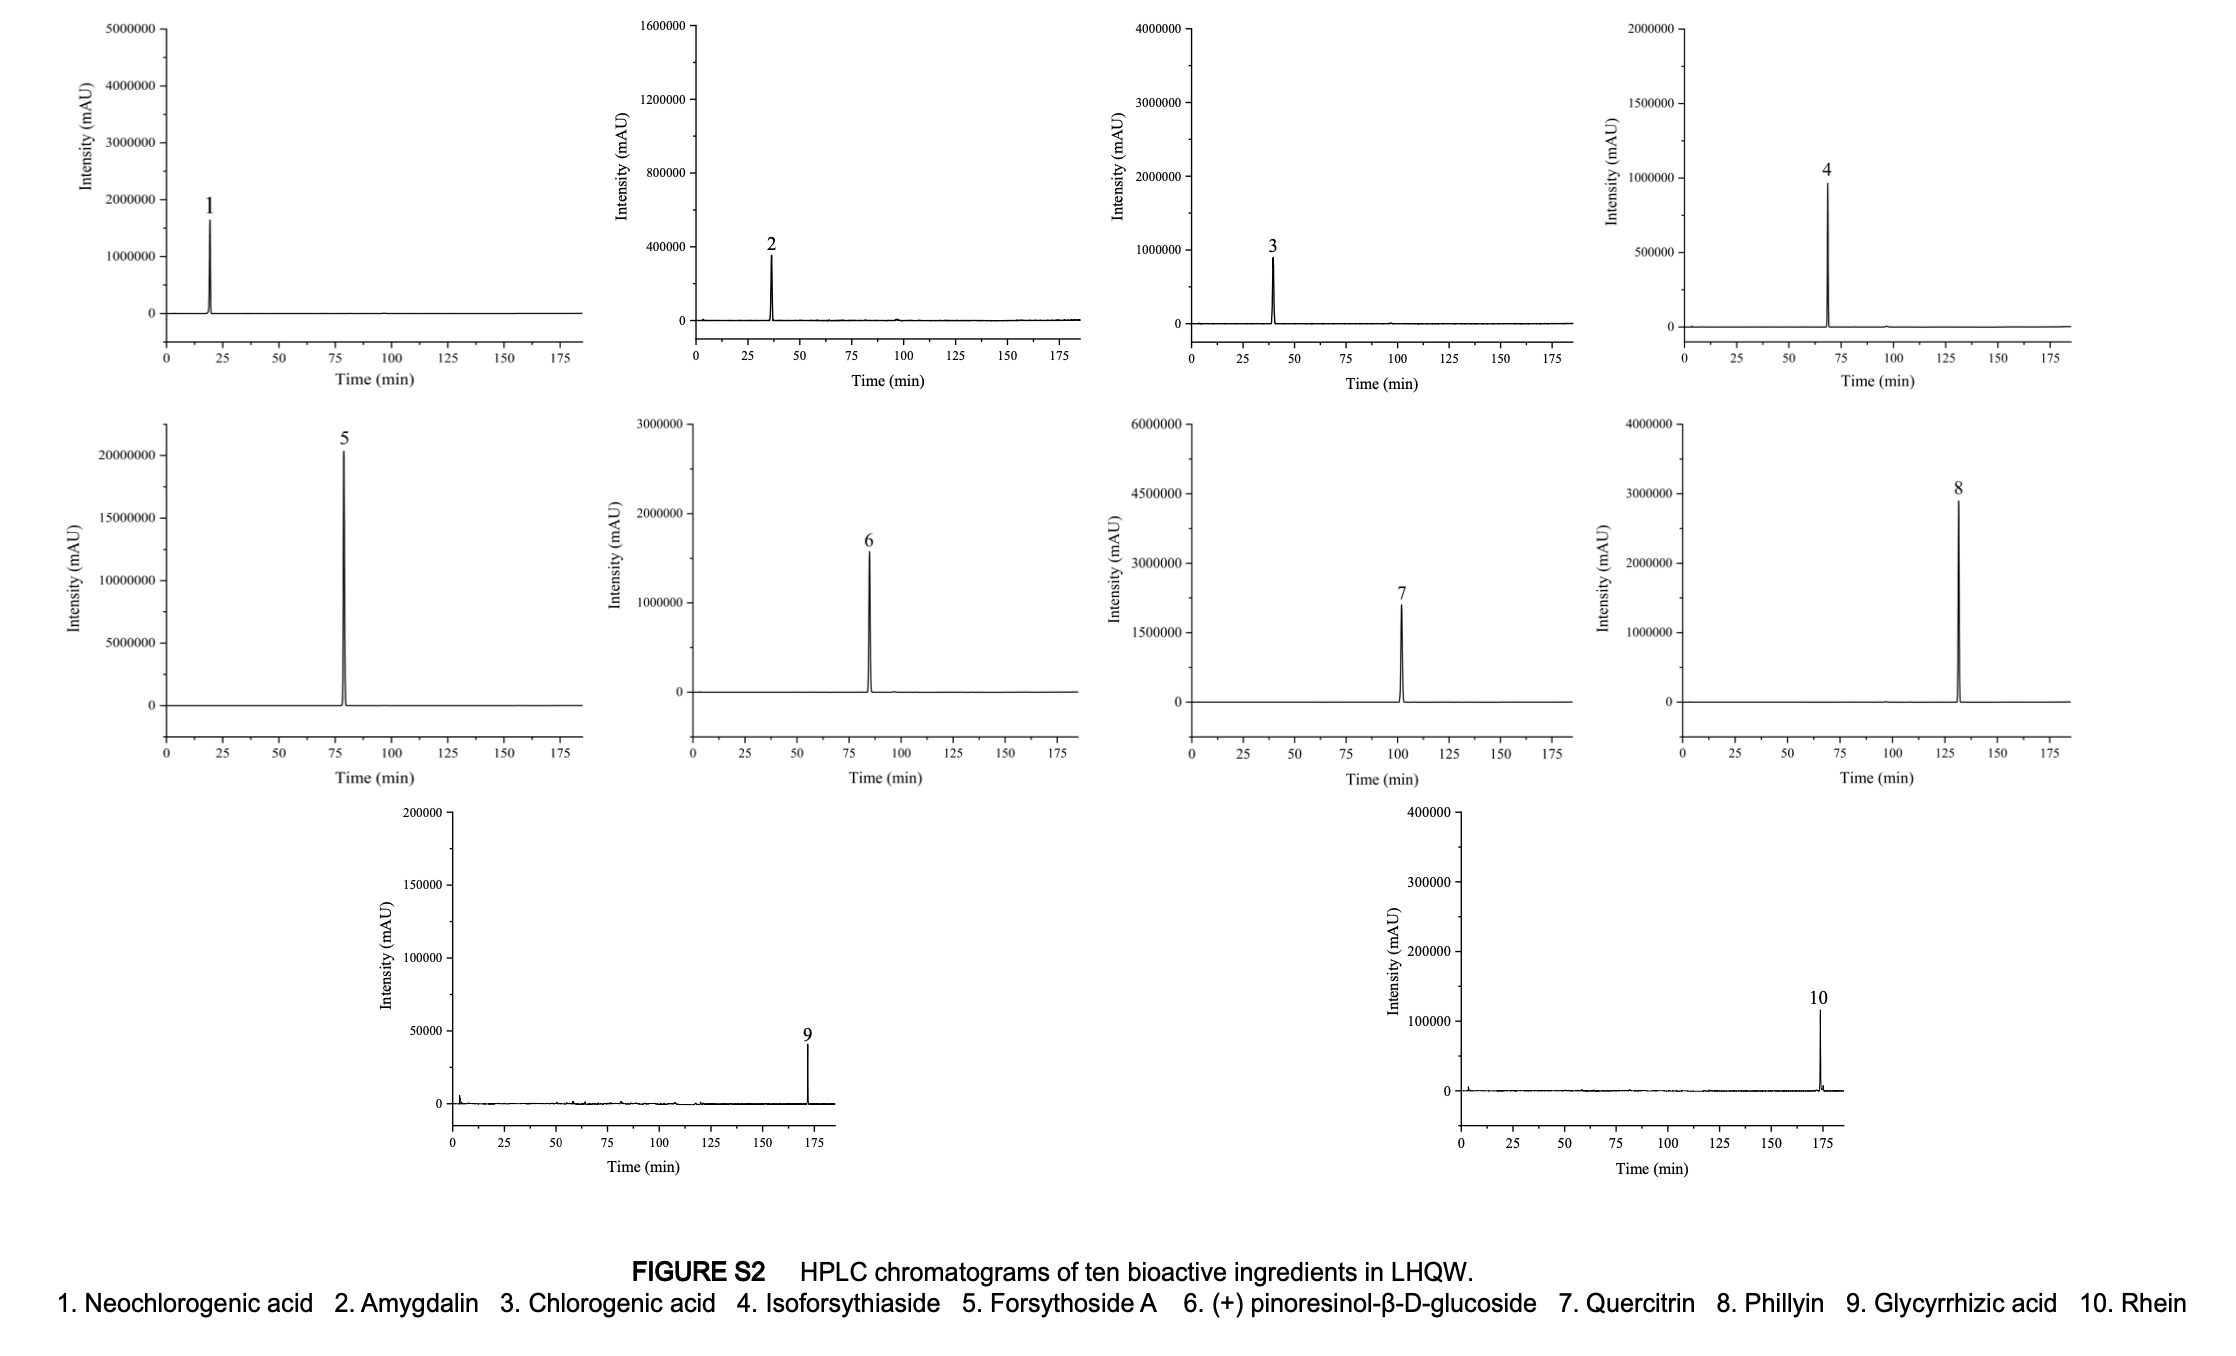

Supplement: f1 [file 2694284.f1.zip › supplementary figures.docx]
